# Supplementary material for: Semi-Volatile Organic Compounds in Car Dust: A Pilot Study in Jeddah, Saudi Arabia
Source: MDPI journal article supplement (doi:10.3390/ijerph18094803), 2021-04-30
Supplement: s1 [file s1]

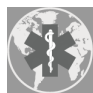

Supplementary material

## Semivolatile Organic Compounds in Car Dust: A Pilot Study in Jeddah, Saudi Arabia

Nadeem Ali <sup>1,\*</sup>, Mohammad W. Kadi <sup>2</sup>, Hussain Mohammed Salem Ali Albar <sup>3</sup>, Muhammad Imtiaz Rashid <sup>1</sup>, Sivaraman Chandrasekaran <sup>1</sup>, Ahmed Saleh Summan <sup>1,4</sup>, Cynthia A. de Wit <sup>5</sup> and Govindan Malarvannan <sup>6,\*</sup>

<sup>1</sup> Centre of Excellence in Environmental Studies, King Abdulaziz University, Jeddah 21589, Saudi Arabia; mimurad@kau.edu.sa (M.I.R.); scsekaran@kau.edu.sa (S.C.); asumman@kau.edu.sa (A.S.S.)

<sup>2</sup> Department of Chemistry, Faculty of Sciences, King Abdul Aziz University, Jeddah 21589, Saudi Arabia; mkadi@kau.edu.sa

<sup>3</sup> Department of Community Health, Medical College, King Abdul Aziz University, Jeddah 21589, Saudi Arabia; hmalbar@kau.edu.sa

<sup>4</sup> Department of Environmental Sciences, King Abdul Aziz University, Jeddah 21589, Saudi Arabia

<sup>5</sup> Department of Environment Science, Stockholm University, 11419 Stockholm, Sweden; Cynthia.deWit@aces.su.se

<sup>6</sup> Toxicological Center, University of Antwerp, 2610 Antwerpen, Belgium

\* Correspondence: nabahadar@kau.edu.sa (N.A.); malarvannan.govindan@uantwerpen.be (G.M.)

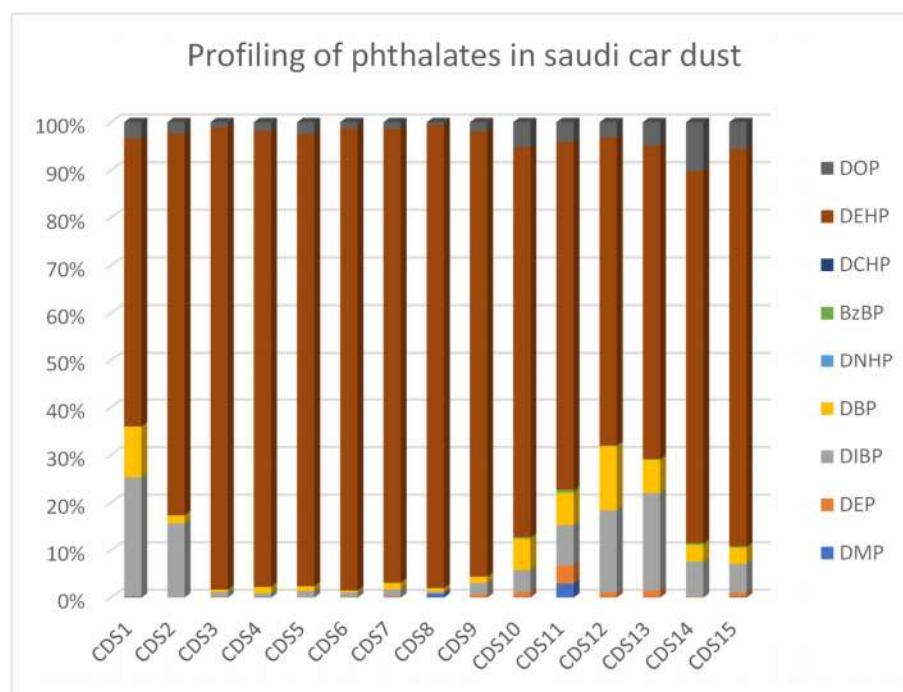

Figure S1. Profile of phthalates in each car dust sample.

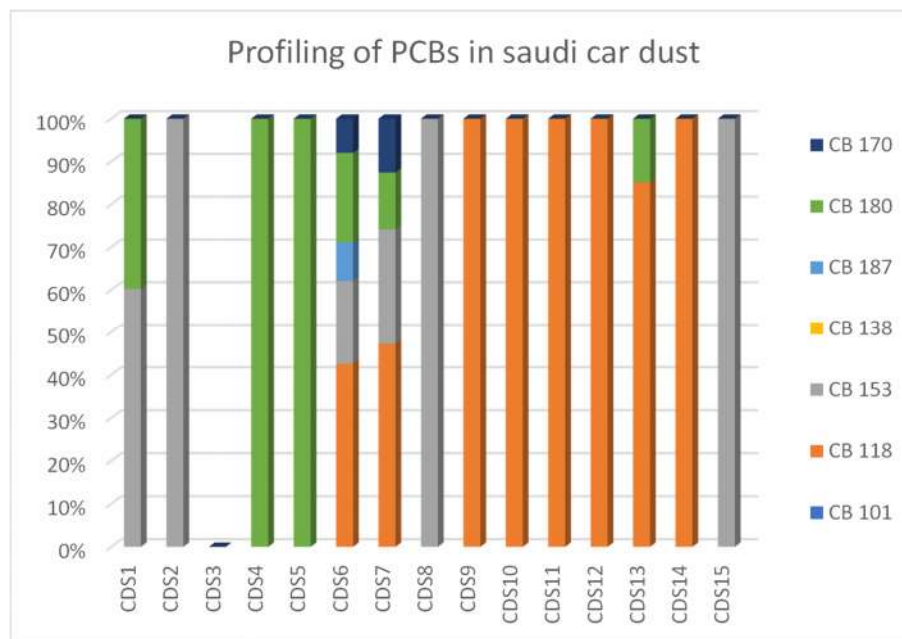

**Figure S2.** Profile of PCB congeners in each car dust sample.

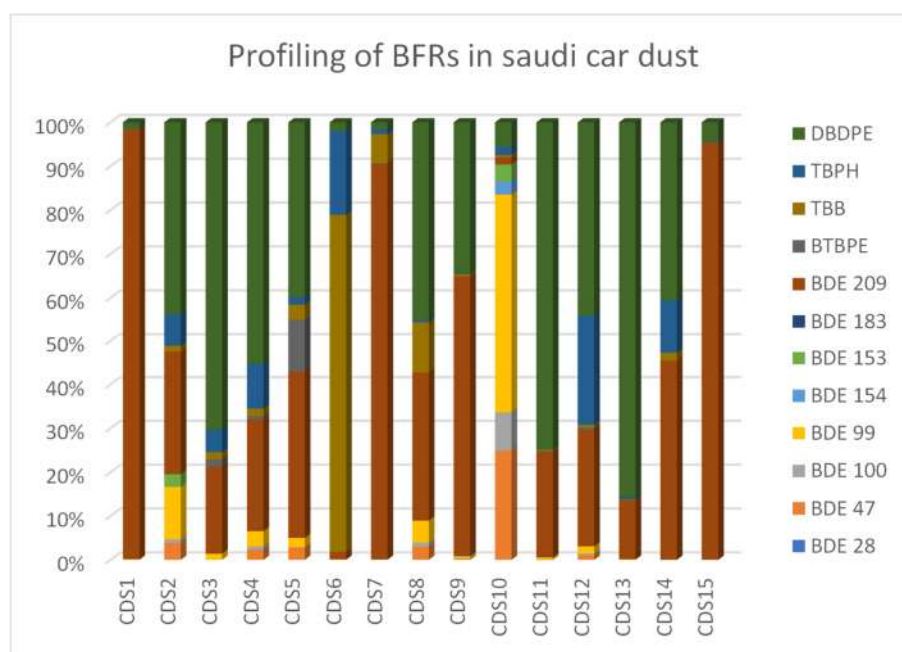

**Figure S3.** Profile of BFRs in each car dust sample.

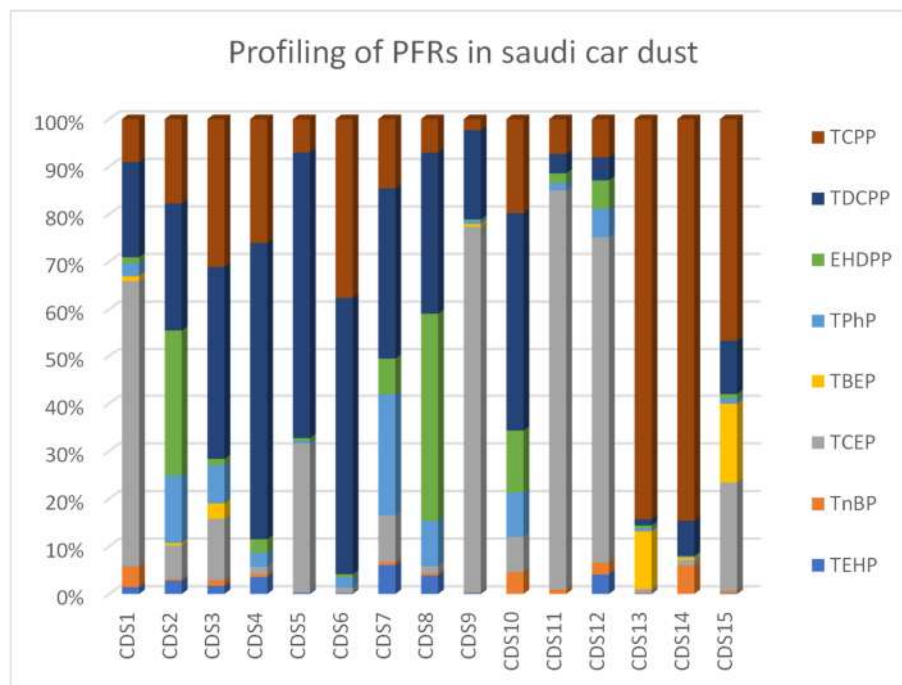

**Figure S4.** Profile of OPFRs in each car dust sample.

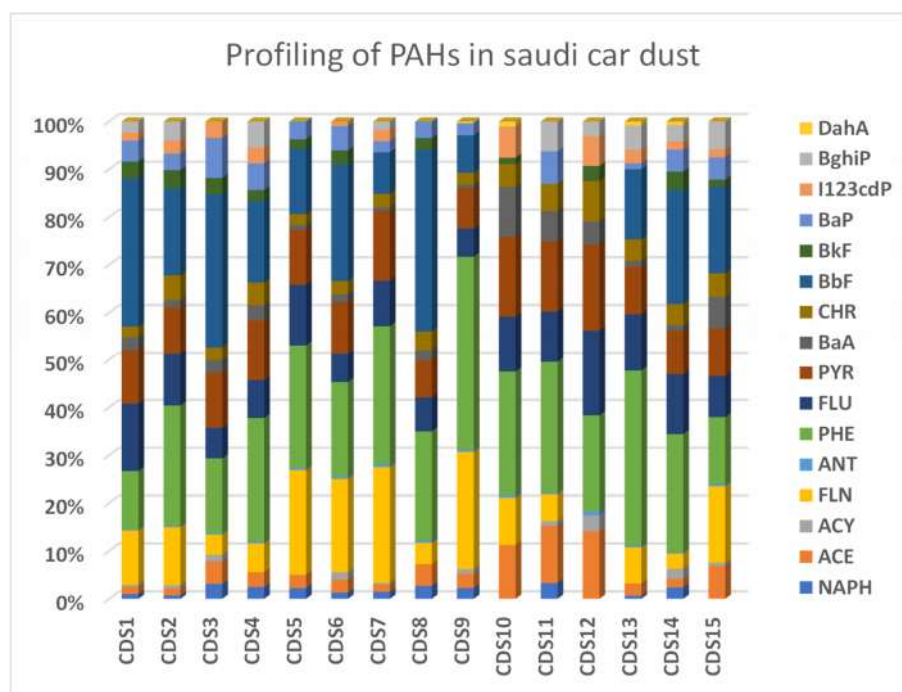

**Figure S5.** Profile of PAHs in each car dust sample.

**Table S1.** The estimated daily exposure (mean, median, 25<sup>th</sup> percentile, maximum) of taxi and regular drivers *via* car dust compared to reference dose values (RfD) from the literature. All values are given in ng/kg BW/day.

|                     | RfD                   | Regular Driver |                |                |                | Taxi Driver    |                |                |                |
|---------------------|-----------------------|----------------|----------------|----------------|----------------|----------------|----------------|----------------|----------------|
|                     |                       | Mean           | Median         | 25th P         | Max            | Mean           | Median         | 25th P         | Max            |
| NAPH                |                       | <0.1           | <0.1           | <0.1           | <0.1           | 0.1            | 0.1            | <0.1           | 0.2            |
| ACE                 | 60 <sup>1</sup>       | <0.1           | <0.1           | <0.1           | <0.1           | 0.1            | 0.1            | 0.1            | 0.2            |
| ACY                 |                       | <0.1           | <0.1           | <0.1           | <0.1           | <0.1           | <0.1           | <0.1           | 0.1            |
| FLN                 | 40 <sup>1</sup>       | 0.1            | <0.1           | <0.1           | 0.3            | 0.6            | 0.3            | <0.1           | 1.6            |
| ANT                 |                       | <0.1           | <0.1           | <0.1           | <0.1           | <0.1           | <0.1           | <0.1           | <0.1           |
| PHE                 | 40 <sup>1</sup>       | 0.2            | 0.2            | <0.1           | 0.4            | 1.1            | 0.8            | 0.2            | 2.2            |
| FLU                 |                       | 0.1            | 0.1            | <0.1           | 0.2            | 0.5            | 0.3            | 0.1            | 1.2            |
| PYR                 | 30 <sup>1</sup>       | 0.1            | 0.1            | <0.1           | 0.2            | 0.5            | 0.4            | 0.1            | 1.2            |
| BaA                 |                       | <0.1           | <0.1           | <0.1           | <0.1           | 0.1            | 0.1            | <0.1           | 0.2            |
| CHR                 |                       | <0.1           | <0.1           | <0.1           | 0.1            | 0.2            | 0.1            | <0.1           | 0.3            |
| BbF                 |                       | 0.2            | 0.1            | <0.1           | 0.5            | 0.8            | 0.7            | <0.1           | 2.3            |
| BkF                 |                       | <0.1           | <0.1           | <0.1           | 0.1            | 0.1            | <0.1           | <0.1           | 0.3            |
| BaP                 | 0.14* <sup>1</sup>    | <0.1           | <0.1           | <0.1           | 0.1            | 0.2            | 0.2            | <0.1           | 0.4            |
| I123cdP             |                       | <0.1           | <0.1           | <0.1           | <0.1           | 0.1            | <0.1           | <0.1           | 0.2            |
| BghiP               |                       | <0.1           | <0.1           | <0.1           | 0.1            | 0.1            | 0.1            | <0.1           | 0.3            |
| DahA                |                       | <0.1           | <0.1           | <0.1           | <0.1           | <0.1           | <0.1           | <0.1           | <0.1           |
| <b>ΣPAHs</b>        |                       | <b>0.9</b>     | <b>0.7</b>     | <b>0.1</b>     | <b>1.8</b>     | <b>4.4</b>     | <b>3.5</b>     | <b>0.7</b>     | <b>9.1</b>     |
| DMP                 |                       | 0.4            | 0.1            | <0.1           | 1.8            | 2.1            | 0.6            | 0.2            | 8.9            |
| DEP                 | 800000 <sup>2</sup>   | 0.6            | 0.4            | 0.2            | 1.9            | 3.1            | 1.9            | 1.2            | 9.6            |
| DIBP                |                       | 28.3           | 4.5            | 1.3            | 129.8          | 142.8          | 22.7           | 6.6            | 654.5          |
| DBP                 | 100000 <sup>2</sup>   | 11.1           | 4.6            | 1.3            | 43.7           | 55.9           | 23.3           | 6.4            | 220.1          |
| DNHP                |                       | <0.1           | <0.1           | <0.1           | <0.1           | <0.1           | <0.1           | <0.1           | <0.1           |
| BzBP                | 200000 <sup>2</sup>   | 0.4            | 0.1            | 0.1            | 1.3            | 2.0            | 0.8            | 0.3            | 6.4            |
| DCHP                |                       | <0.1           | <0.1           | <0.1           | <0.1           | <0.1           | <0.1           | <0.1           | <0.1           |
| DEHP                | 20000 <sup>2</sup>    | 278.7          | 296.4          | 22.2           | 538.8          | 1405.3         | 1494.7         | 111.9          | 2716.7         |
| DOP                 |                       | 11.4           | 4.5            | 1.3            | 41.6           | 57.4           | 22.8           | 6.4            | 209.5          |
| <b>Σ Phthalates</b> |                       | <b>330.9</b>   | <b>304.5</b>   | <b>27.7</b>    | <b>758.1</b>   | <b>1668.6</b>  | <b>1535.3</b>  | <b>139.8</b>   | <b>3822.3</b>  |
| TEHP                |                       | <0.1           | <0.1           | <0.1           | 0.1            | 0.2            | 0.2            | <0.1           | 0.7            |
| TnBP                | 24000 <sup>3</sup>    | 0.1            | <0.1           | <0.1           | 0.5            | 0.6            | 0.1            | <0.1           | 2.7            |
| TCEP                | 22000 <sup>3</sup>    | 1.7            | 0.3            | <0.1           | 6.7            | 8.4            | 1.5            | 0.1            | 34.0           |
| TBEP                | 15000 <sup>3</sup>    | 0.4            | <0.1           | <0.1           | 2.6            | 1.9            | <0.1           | <0.1           | 12.9           |
| TPhP                | 70000 <sup>3</sup>    | 0.2            | 0.1            | <0.1           | 0.6            | 0.9            | 0.6            | 0.1            | 3.1            |
| EHDPP               |                       | 0.2            | <0.1           | <0.1           | 1.1            | 1.2            | 0.2            | 0.1            | 5.6            |
| TDCPP               | 15000 <sup>3</sup>    | 2.1            | 0.6            | <0.1           | 9.1            | 10.6           | 3.2            | 0.2            | 45.7           |
| TCPP                | 80000 <sup>3</sup>    | 3.9            | 0.4            | <0.1           | 18.2           | 19.5           | 2.0            | 0.2            | 91.7           |
| <b>ΣOPFRs</b>       |                       | <b>8.6</b>     | <b>2.5</b>     | <b>0.4</b>     | <b>21.5</b>    | <b>43.5</b>    | <b>12.6</b>    | <b>1.8</b>     | <b>108.6</b>   |
| BDE 28              |                       | <0.1           | <0.1           | <0.1           | <0.1           | <0.1           | <0.1           | <0.1           | <0.1           |
| BDE 47              | 100 <sup>4</sup>      | <0.1           | <0.1           | <0.1           | <0.1           | <0.1           | <0.1           | <0.1           | 0.1            |
| BDE 100             |                       | <0.1           | <0.1           | <0.1           | <0.1           | <0.1           | <0.1           | <0.1           | <0.1           |
| BDE 99              | 100 <sup>4</sup>      | <0.1           | <0.1           | <0.1           | <0.1           | <0.1           | <0.1           | <0.1           | 0.2            |
| BDE 154             |                       | <0.1           | <0.1           | <0.1           | <0.1           | <0.1           | <0.1           | <0.1           | <0.1           |
| BDE 153             | 200 <sup>4</sup>      | <0.1           | <0.1           | <0.1           | <0.1           | <0.1           | <0.1           | <0.1           | <0.1           |
| BDE 183             |                       | <0.1           | <0.1           | <0.1           | <0.1           | <0.1           | <0.1           | <0.1           | <0.1           |
| BDE 209             | 7000 <sup>4</sup>     | 1.4            | <0.1           | <0.1           | 6.9            | 7.1            | 0.2            | <0.1           | 35.0           |
| BTBPE               | 243000 <sup>5</sup>   | <0.1           | <0.1           | <0.1           | <0.1           | <0.1           | <0.1           | <0.1           | 0.1            |
| TBB                 | 20000 <sup>5</sup>    | 0.2            | <0.1           | <0.1           | 1.1            | 0.9            | <0.1           | <0.1           | 5.3            |
| TBPH                | 20000 <sup>5</sup>    | 0.1            | <0.1           | <0.1           | 0.2            | 0.3            | <0.1           | <0.1           | 1.2            |
| DBDPE               | 333333 <sup>5</sup>   | 0.2            | 0.1            | <0.1           | 0.7            | 1.0            | 0.3            | 0.1            | 3.5            |
| <b>ΣBFRs</b>        |                       | <b>1.9</b>     | <b>0.2</b>     | <b>0.1</b>     | <b>7.4</b>     | <b>9.3</b>     | <b>1.0</b>     | <b>0.4</b>     | <b>37.4</b>    |
| CB 101              |                       | <0.1           | <0.1           | <0.1           | <0.1           | <0.1           | <0.1           | <0.1           | <0.1           |
| CB 118              |                       | <0.1           | <0.1           | <0.1           | <0.1           | <0.1           | <0.1           | <0.1           | <0.1           |
| CB 153              |                       | <0.1           | <0.1           | <0.1           | <0.1           | <0.1           | <0.1           | <0.1           | <0.1           |
| CB 138              |                       | <0.1           | <0.1           | <0.1           | <0.1           | <0.1           | <0.1           | <0.1           | <0.1           |
| CB 187              |                       | <0.1           | <0.1           | <0.1           | <0.1           | <0.1           | <0.1           | <0.1           | <0.1           |
| CB 180              |                       | <0.1           | <0.1           | <0.1           | <0.1           | <0.1           | <0.1           | <0.1           | <0.1           |
| CB 170              |                       | <0.1           | <0.1           | <0.1           | <0.1           | <0.1           | <0.1           | <0.1           | <0.1           |
| <b>ΣPCBs</b>        | <b>30<sup>6</sup></b> | <b>&lt;0.1</b> |

|                       |              |              |             |              |               |               |              |               |
|-----------------------|--------------|--------------|-------------|--------------|---------------|---------------|--------------|---------------|
| <b>ΣAll chemicals</b> | <b>342.3</b> | <b>306.5</b> | <b>28.6</b> | <b>780.3</b> | <b>1725.9</b> | <b>1545.5</b> | <b>144.0</b> | <b>3934.3</b> |
|-----------------------|--------------|--------------|-------------|--------------|---------------|---------------|--------------|---------------|

\*Virtually safe dose; <sup>1</sup>Bulder et al., 2006; <sup>2</sup>ATSDR, 2001; <sup>3</sup>Ali et al., 2012; <sup>4</sup>EPA, 2008; <sup>5</sup>Hardy et al., 2008; <sup>6</sup>ATSDR, 2000.

## References

1. Bulder, A.S., Hoogenboom, L.A.P., Kan, C.A., Van Raamsdonk, L.W.D., Traag, W.A. and Bouwmeester, H., 2006. Initial risk assessment of polycyclic aromatic hydrocarbons (PAHs) in feed (materials) (No. 2006.001). RIKILT.
2. ATSDR, 2001. Toxicological profile for di-n-butyl phthalate. U.S. Department of Health and Human Services, Public Health Service, Agency for Toxic Substances and Disease Registry, September 2001, U.S. Department of Health and Human Services.
3. Ali, N., Van den Eede, N., Dirtu, A.C., Neels, H., Covaci, A., 2012b. Assessment of human exposure to indoor organic contaminants via dust ingestion in Pakistan. *Indoor Air* 22, 200–211.
4. EPA (USA Environmental Protection Agency), 2008. Integrated risk information system, <http://www.epa.gov/iris/subst/0294.htm> (accessed on 05/10/2012).
5. Hardy, M., Biesemeir, J., Banasik, M., Stedeford, T., 2008. Brominated flame retardants in house dust: Detection does not equate to risk. *Environ. Sci. Technol.* 42, 9453-9454.
6. ATSDR (Agency for Toxic Substances and Disease Registry), 2000. Toxicological profile for polychlorinated biphenyls (PCBs), Atlanta.
